# Supplementary material
Source: publisher site journal article supplement (https://www.dovepress.com/article/451189)
Supplement: Supplementary file 1 [file get_supplementary_file.php]

**Supplementary table 1** Baseline characteristics of study participants

| **MHR Quartile** | **Q1(≤-0.67)** | **Q2(-0.67 to ≤-0.52)** | **Q3(-0.52 to ≤-0.39)** | **Q4(>-0.39)** | **Pvalue** |
| --- | --- | --- | --- | --- | --- |
| N | 21323 (25.00%) | 21955 (25.74%) | 21176 (24.83%) | 20839 (24.43%) |  |
| Age (years) | 49.13±12.65 | 50.17±12.97 | 50.6±13.34 | 51.29±13.89 | ＜0.001 |
| Gender |  |  |  |  | ＜0.001 |
| Male | 7321 (34.33%) | 12646 (57.60%) | 15934 (75.25%) | 18581 (89.16%) |  |
| Female | 14002 (65.67%) | 9309 (42.40%) | 5242 (24.75%) | 2258 (10.84%) |  |
| BMI (kg/m²) | 22.89 (20.96, 25.04) | 24.16 (22.21, 26.20) | 24.96 (23.06, 26.93) | 25.78 (23.93, 27.78) | ＜0.001 |
| SBP (mmHg) | 122.38±17.89 | 125.65±17.79 | 127.63±17.58 | 129.24±17.17 | ＜0.001 |
| DBP (mmHg) | 74.19±11.62 | 77.34±11.93 | 79.21±11.99 | 80.54±11.90 | ＜0.001 |
| HbA1c (%) | 5.54±0.34 | 5.57±0.34 | 5.59±0.35 | 5.62±0.34 | ＜0.001 |
| FPG (mmol/L) | 5.1±0.50 | 5.13±0.54 | 5.14±0.54 | 5.15±0.57 | ＜0.001 |
| Scr (umol/L) | 62.50 (55.00, 73.00) | 68.00 (58.00, 78.00) | 72.00 (62.80, 81.00) | 74.40 (66.40, 82.50) | ＜0.001 |
| ALT (U/L) | 16.80 (12.50, 23.00) | 19.00 (14.00, 27.00) | 22.00 (16.00, 31.00) | 24.00 (17.00, 35.00) | ＜0.001 |
| TG (mmol/L) | 1.07 (0.79, 1.48) | 1.30 (0.94, 1.82) | 1.50 (1.09, 2.10) | 1.74 (1.26, 2.49) | ＜0.001 |
| TC (mmol/L) | 5.09±0.98 | 4.9±0.96 | 4.78±0.95 | 4.63±0.97 | ＜0.001 |
| HDL-C (mmol/L) | 1.57±0.33 | 1.33±0.25 | 1.19±0.21 | 1.04±0.18 | ＜0.001 |
| LDL-C (mmol/L) | 2.97±0.81 | 2.99±0.80 | 2.96±0.80 | 2.88±0.82 | ＜0.001 |
| UA (umol/L) | 303.96±81.23 | 336.71±84.70 | 361.36±84.45 | 384.46±83.34 | ＜0.001 |
| WBC (109/L) | 4.85 (4.20, 5.60) | 5.50 (4.80, 6.30) | 6.00 (5.25, 6.80) | 6.90 (6.00, 7.90) | ＜0.001 |
| Monocyte (109/L) | 0.25 (0.21, 0.29) | 0.34 (0.30, 0.38) | 0.41 (0.36, 0.46) | 0.53 (0.46, 0.61) | ＜0.001 |

# Notes: values are N (%) or mean ± SD or median (quartile)

# Abbreviations: body mass index (BMI), systolic blood pressure (SBP), diastolic blood pressure (DBP), Hemoglobin A1c (HbA1c), fasting plasma glucose (FPG), serum creatinine (Scr), alanine aminotransferase (ALT), triglycerides (TG), total cholesterol (TC), high-density lipoprotein cholesterol (HDL-C), low-density lipid cholesterol (LDL-C), uric acid (UA), white blood cell (WBC), monocyte-to-high-density lipoprotein ratio (MHR), MHR value was log10-transformed.

**Supplementary Table 2** The characteristics of participants on both sides of the inflection point

| Characteristics | MHR **≤** -0.40 | MHR＞-0.40 | P value |
| --- | --- | --- | --- |
| N | 22247 | 63046 |  |
| Age (years) | 49.95±13.00 | 51.24±13.84 | ＜0.001 |
| Gender |  |  |  |
| Male | 34758 (55.13) | 19724 (88.66) | ＜0.001 |
| Female | 28288 (44.87) | 2523 (11.34) | ＜0.001 |
| BMI (kg/m²) | 24.01 (21.94, 26.12) | 25.74 (23.88,27.75) | ＜0.001 |
| SBP (mmHg) | 125.15±17.88 | 129.18±17.21 | ＜0.001 |
| DBP (mmHg) | 76.85±12.01 | 80.5±11.93 | ＜0.001 |
| FPG (mmol/L) | 5.57±0.34 | 5.62±0.34 | ＜0.001 |
| Scr (umol/L) | 5.12±0.53 | 5.15±0.57 | ＜0.001 |
| ALT (U/L) | 67.6 (57.90, 77.90) | 74.30 (66.2,82.4) | ＜0.001 |
| TG (mmol/L) | 1.27 (0.91, 1.80) | 1.73 (1.25, 2.46) | ＜0.001 |
| TC (mmol/L) | 4.93±0.97 | 4.64±0.98 | ＜0.001 |
| HDL-C (mmol/L) | 1.37±0.31 | 1.04±0.19 | ＜0.001 |
| LDL-C (mmol/L) | 2.98±0.80 | 2.88±0.82 | ＜0.001 |
| UA (umol/L) | 327.00 (270.00, 389.00) | 379.00 (328.00, 435.00) | ＜0.001 |
| WBC (109/L) | 5.41 (4.68, 6.30) | 6.80 (5.90, 7.89) | ＜0.001 |
| Monocyte (109/L) | 0.26 (0.19, 0.32) | 0.49 (0.44, 0.57) | ＜0.001 |

**Notes:** values are N (%) or mean ± SD or median (quartile).

**Abbreviations:** body mass index (BMI), systolic blood pressure (SBP), diastolic blood pressure (DBP), fasting plasma glucose (FPG), serum creatinine (Scr), alanine aminotransferase (ALT), triglycerides (TG), total cholesterol (TC), high-density lipoprotein cholesterol (HDL-C), low-density lipid cholesterol (LDL-C), uric acid (UA), white blood cell (WBC). monocyte-to-high-density lipoprotein ratio (MHR), MHR value was log10-transformed.


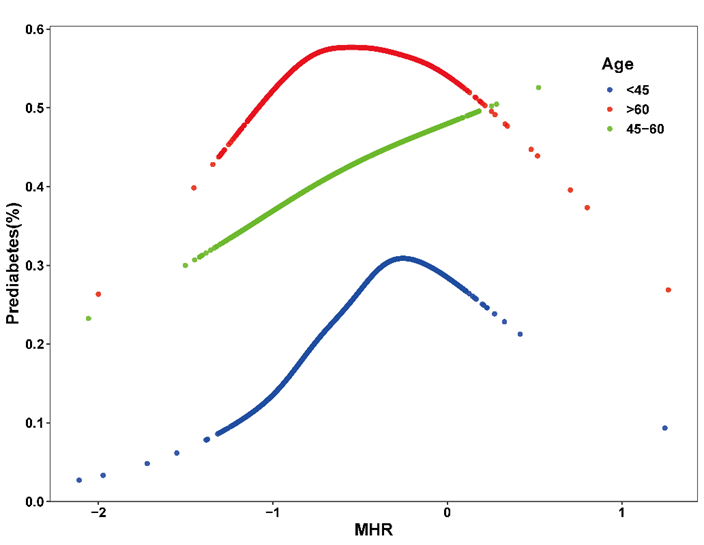

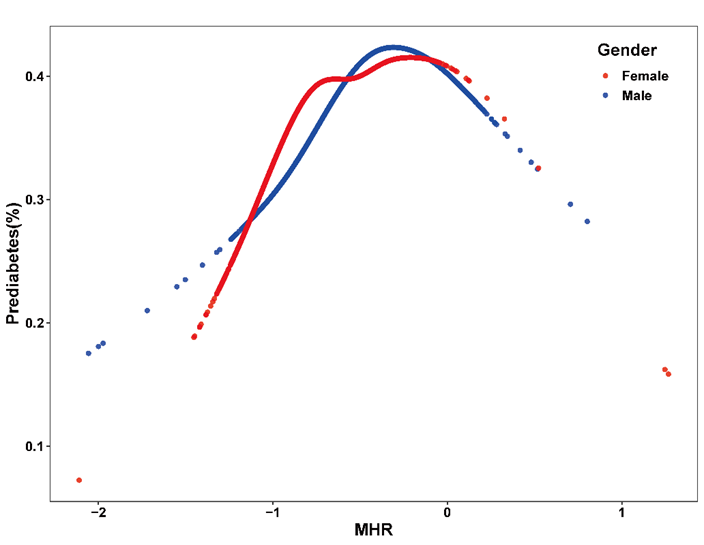


A B

| 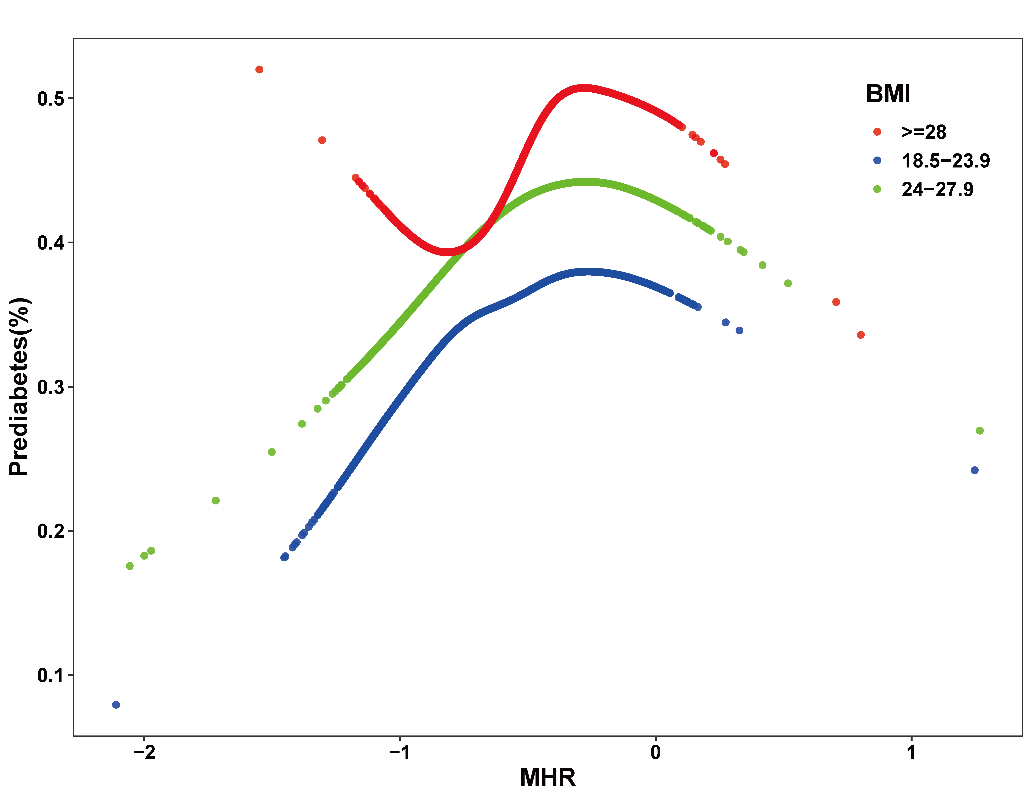  C | 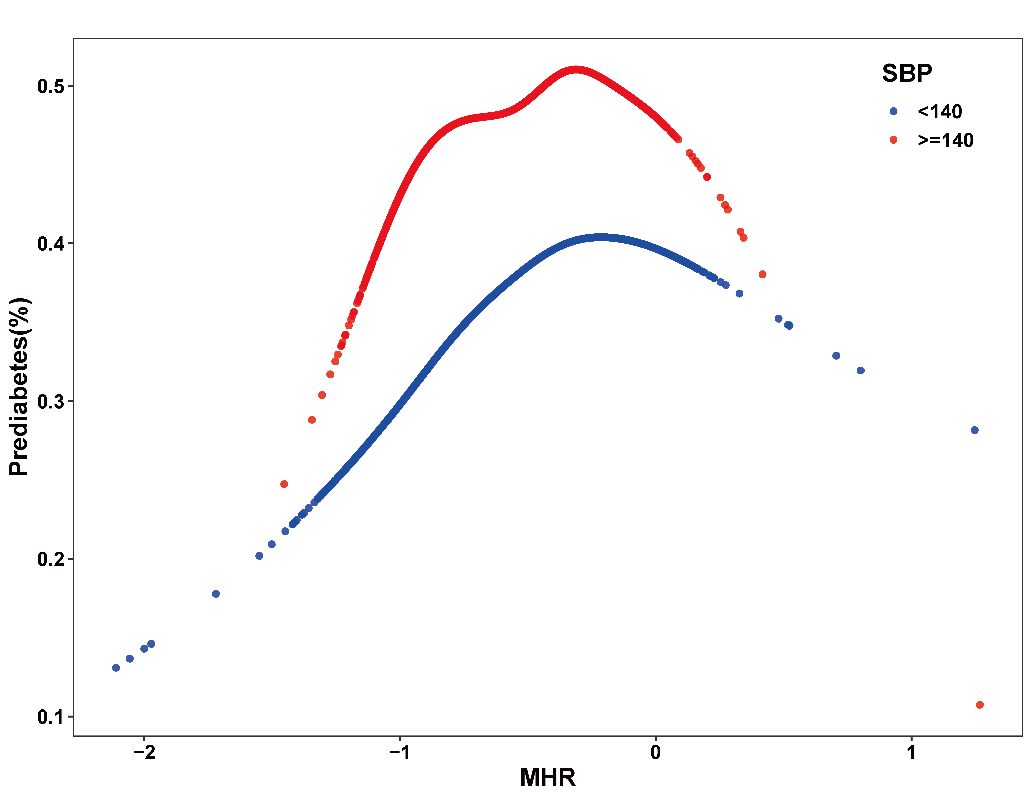  D |
| --- | --- |
| 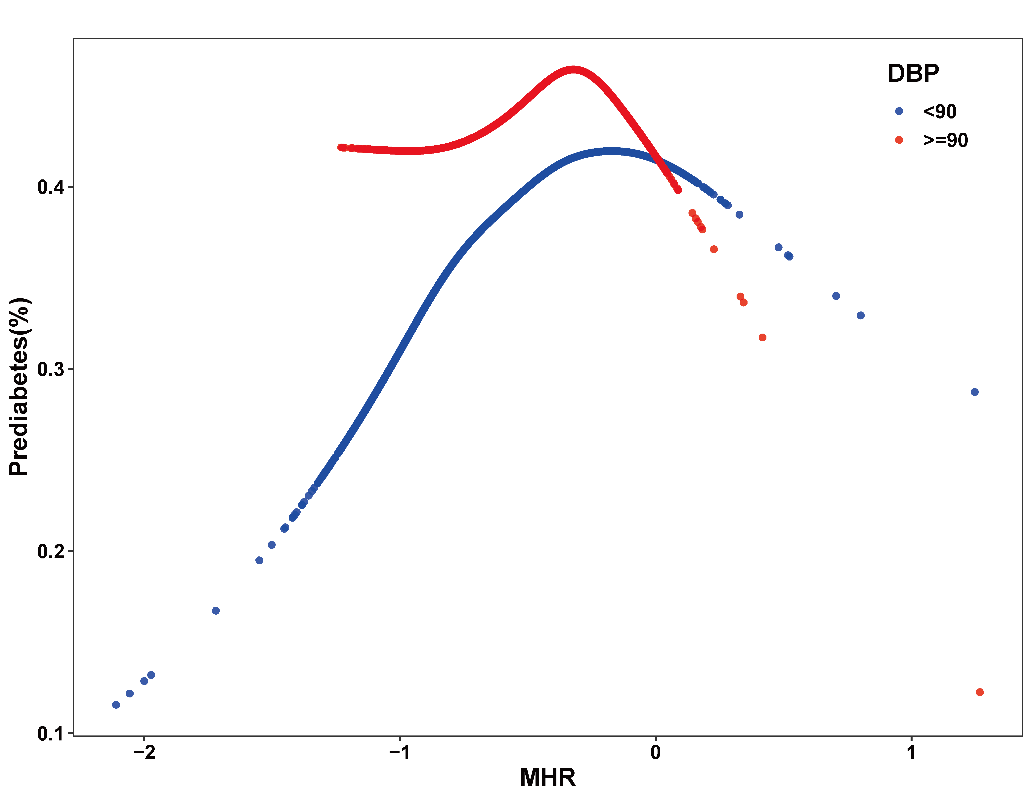  E | 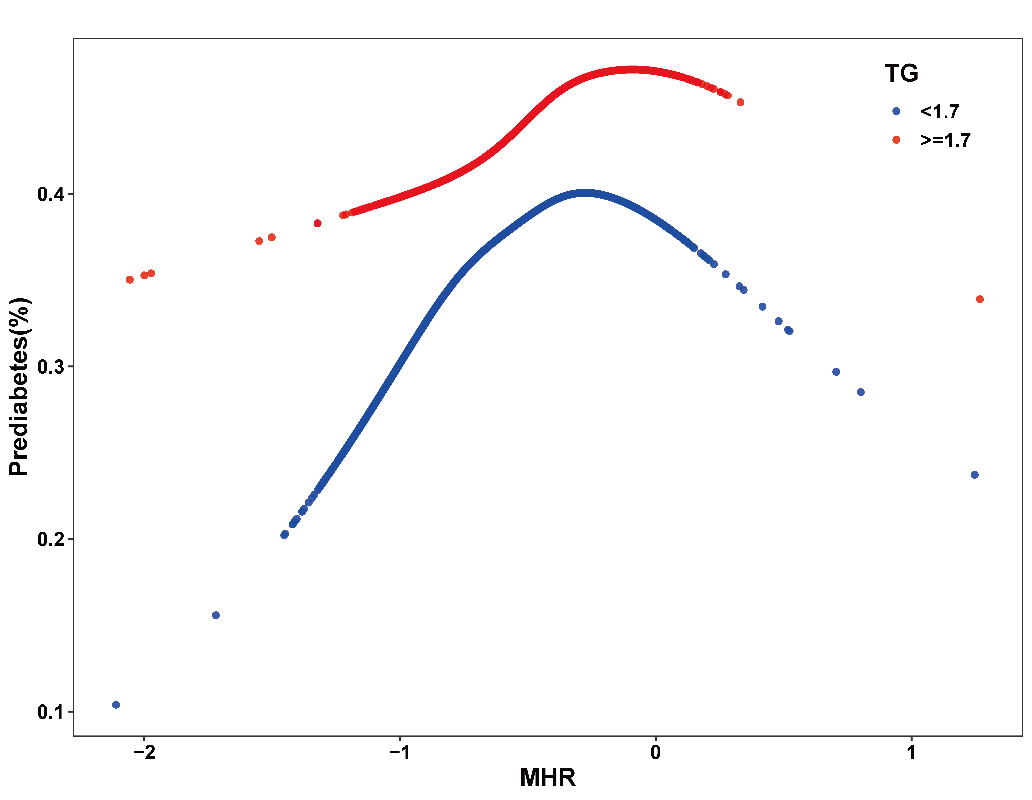  F |
| 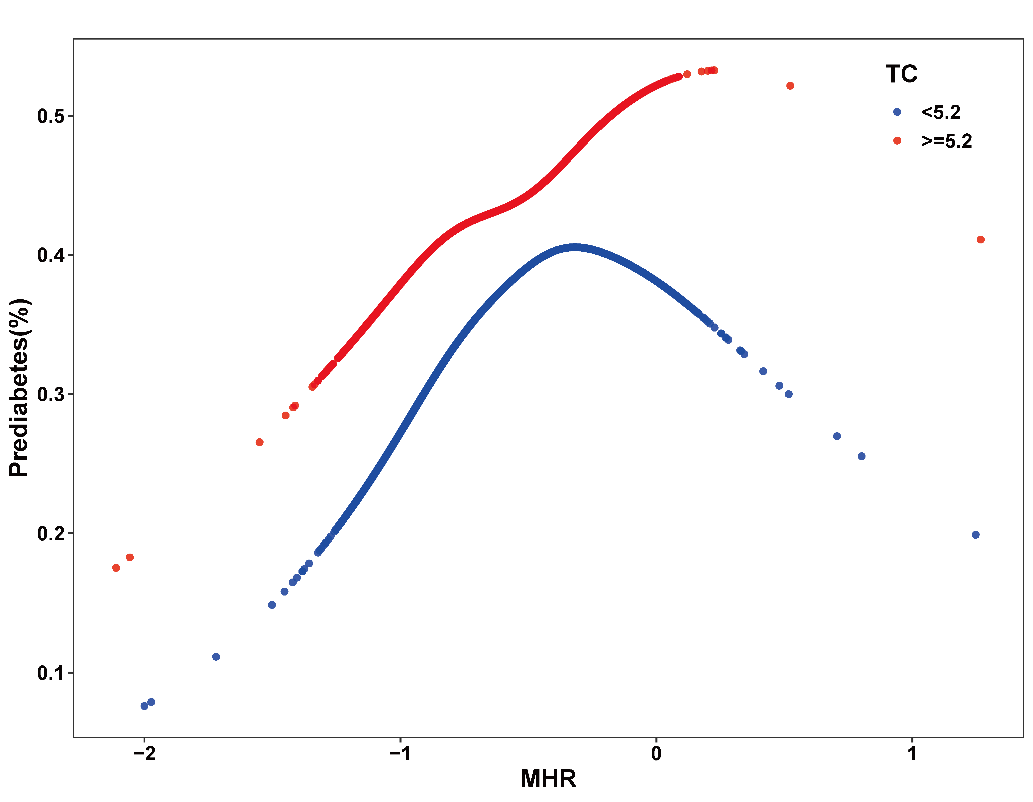 | 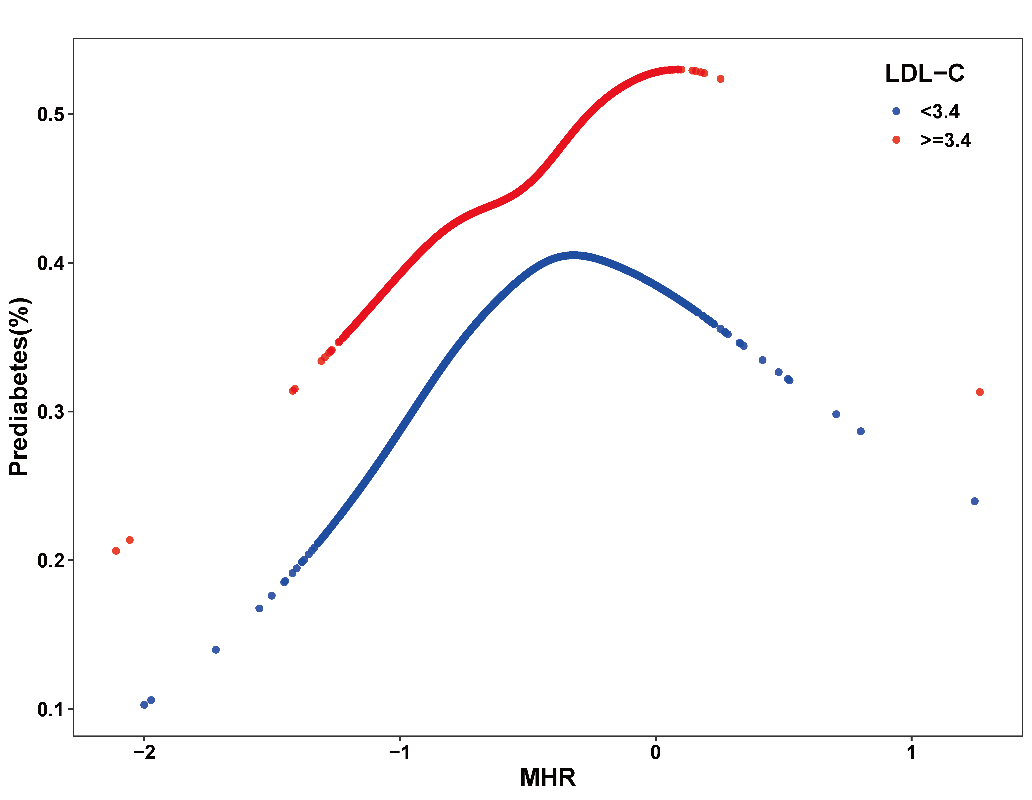 |

G H

**Supplementary Figure 1** Association between MHR and prediabetes

A: Stratified by age; B: Stratified by gender; C: Stratified by BMI; D: Stratified by SBP; E: Stratified by DBP; F: Stratified by TG; G: Stratified by TC; H: stratification by LDL-C

Adjustment factors: Adjusted for age, gender, BMI, SBP, DBP, FPG, Scr, TG, TC, LDL-C, UA, WBC. The model was not individually adjusted for age, gender, BMI, SBP, DBP, TG, TC, LDL-C. Each line represents a smooth curve fit between variables.
